# Supplementary material
Source: Springer Nature journal article supplement (https://www.springermedizin.de/resource/supplementary/12968_2011_3259_MOESM8_ESM.pdf/9583630)
Supplement: MOESM8 [file 9583630]

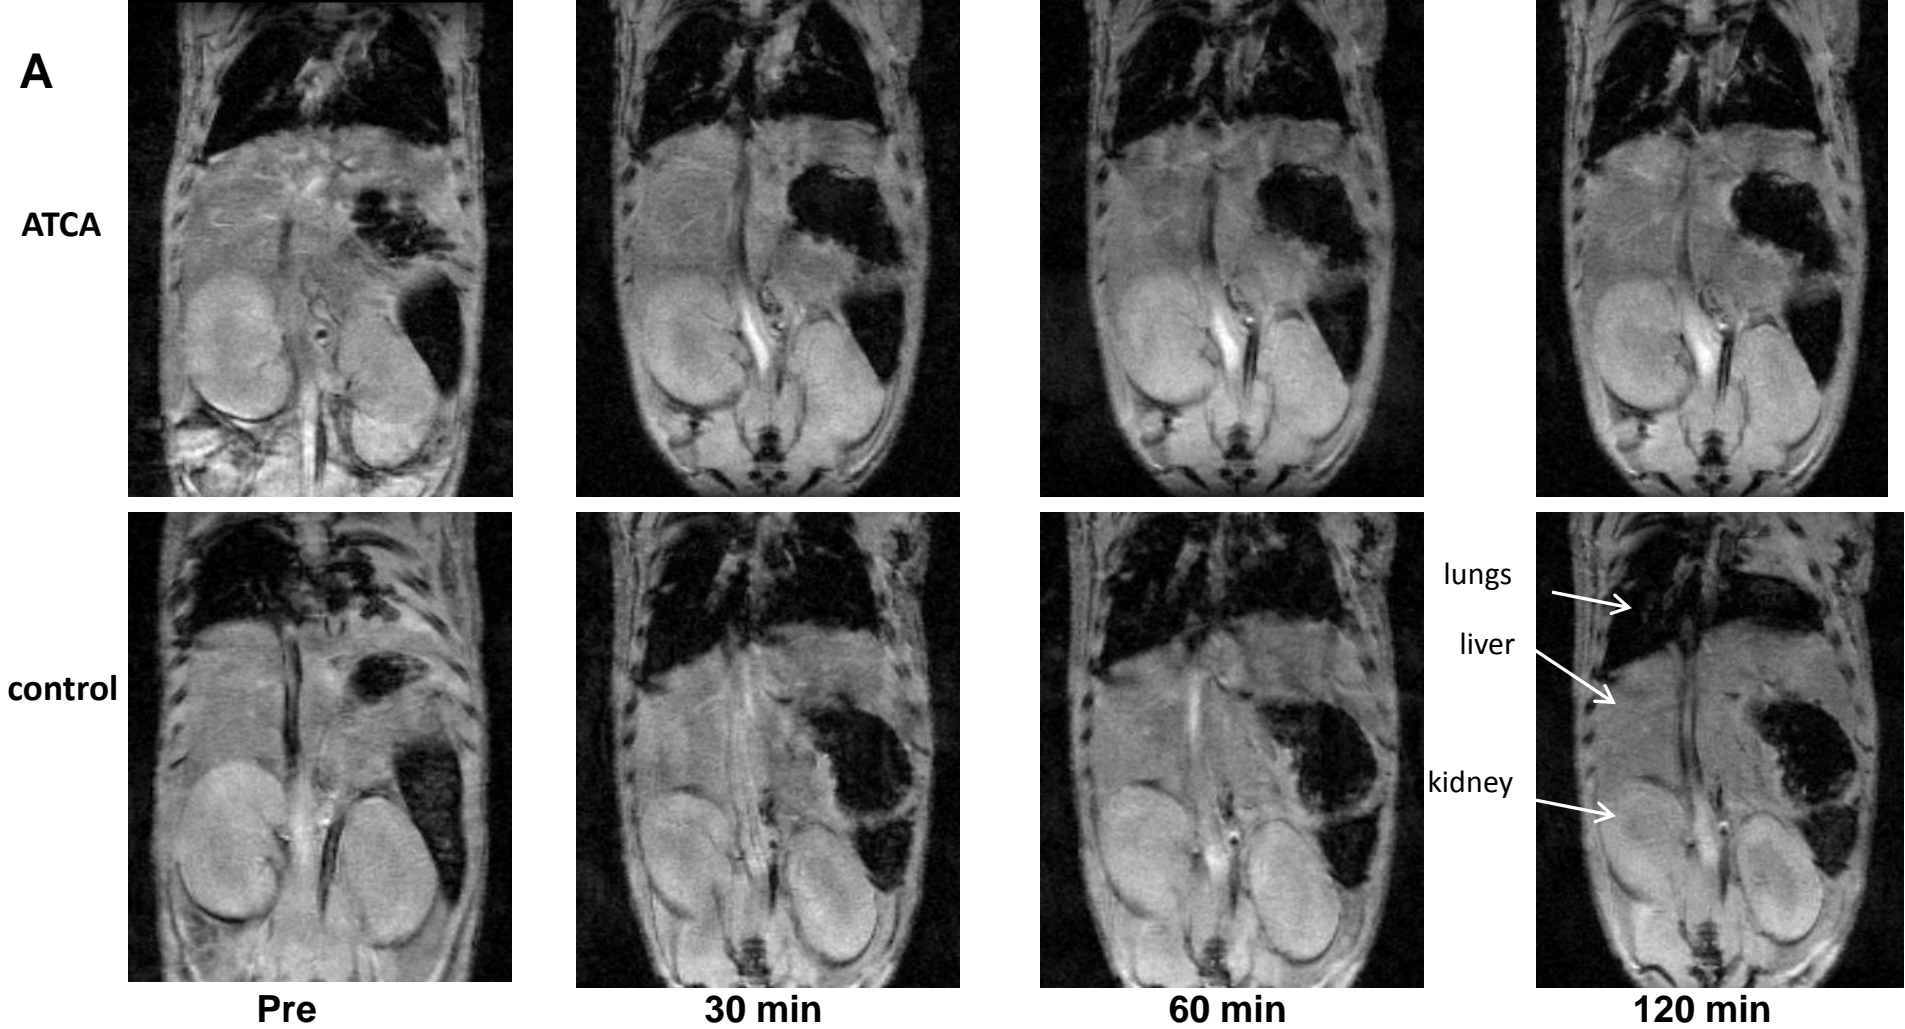

**B**

|                                   | Day 2     |                    |         |                   | Day 7     |                    |         |                   |
|-----------------------------------|-----------|--------------------|---------|-------------------|-----------|--------------------|---------|-------------------|
|                                   | Untreated |                    | Treated |                   | Untreated |                    | Treated |                   |
|                                   | n         | Activity U/L       | n       | Activity U/L      | n         | Activity U/L       | n       | Activity U/L      |
| Aspartate Amino Transferase (AST) | 4         | 27.5 ( $\pm$ 9.2)  | 4       | 21.7 ( $\pm$ 8.6) | 4         | 20.5 ( $\pm$ 3.2)  | 4       | 19.7 ( $\pm$ 8.6) |
| Alanine Amino Transferase (ALT)   | 4         | 64.2 ( $\pm$ 11.5) | 4       | 52.7 ( $\pm$ 7.7) | 4         | 68.7 ( $\pm$ 11.5) | 4       | 62.9 ( $\pm$ 7.7) |

*n* = Number of Mice evaluated in Duplicates
